# Supplementary material for: Effect of Medication Reconciliation at Hospital Admission on 30-Day Returns to Hospital: A Randomized Clinical Trial
Source: PubMed Central journal article supplement (PMC8446815; doi:10.1001/jamanetworkopen.2021.24672), 2021-09-16
Supplement: jamanetwopen-e2124672-s001.pdf [file jamanetwopen-e2124672-s001.pdf]

# Clinical Study Protocol

**Parallel group randomized controlled trial to assess the impact of medication reconciliation at hospital admission on healthcare outcomes.**

*Short title:* Medication reconciliation at hospital admission

*Trial acronym:* MedRec

Study Type: Clinical trial with the therapeutic activity of medication reconciliation

Study Categorisation: Risk category A

Study Registration: Trial registered at *clinicaltrials.gov* (NCT03654963), and in the SNCTP on *kofam.ch* (via BASEC, ID 2018-01536)

Study Identifier: n.a.

Sponsor, Sponsor-Investigator or Principal Investigator: Sponsor:  
Ente Ospedaliero Cantonale  
Viale Officina 3  
6501 Bellinzona - Switzerland  
Email: [direzione.generale@eoc.ch](mailto:direzione.generale@eoc.ch)  
Telephone: +41 91 8111301

Principal Investigator:  
Prof. Dr. med. Alessandro Ceschi  
Medical and scientific director  
Istituto di Scienze Farmacologiche della Svizzera Italiana  
Clinica di Farmacologia e Tossicologia Clinica  
Ente Ospedaliero Cantonale  
Via Tesserete 46  
6903 Lugano – Switzerland  
Email: [alessandro.ceschi@eoc.ch](mailto:alessandro.ceschi@eoc.ch)  
Telephone: +41 91 8116863

Investigational Product: n.a.

Protocol Version and Date: Version 5 (31/12/2019)

CONFIDENTIAL

The information contained in this document is confidential and property of the Direzione Generale Ente Cantonale Ospedaliero (EOC) in collaboration with the Istituto di Scienze Farmacologiche della Svizzera Italiana (ISFSI). The information may not - in full or in part - be transmitted, reproduced, published, or disclosed to others than the applicable Competent Ethics Committee (CEC), without prior written authorisation from the Sponsor and the Principal Investigator.

19 Signature Page(s)

20

Study number Trial registered at *clinicaltrials.gov* (NCT03654963), and in the SNCTP on *kofam.ch* (via BASEC, ID 2018-01536)

Study Title Parallel group randomized controlled trial to assess the impact of medication reconciliation at hospital admission on healthcare outcomes

21

22 The Principal Investigator, the co-investigator, the trial statistician, the scientific collaborator, the  
23 clinical pharmacist and the computer scientist, have approved the protocol version 1 (17.08.2018), and  
24 confirm hereby to conduct the study according to the protocol, current version of the World Medical  
25 Association Declaration of Helsinki, ICH-GCP guidelines or ISO 14155 norm if applicable and the local  
26 legally applicable requirements.

27

28 Principal Investigator:

29 Prof. Dr. med. Alessandro Ceschi

30 Lugano 20/08/2018



Signature

31 Co-Investigator

32 Prof. Dr. med. Paolo Ferrari

33

34 Bellinzona 20/08/2018



Signature

35 Trial statistician:

36 PD Dr. med. Alberto Pagnamenta

37 Mendrisio 20/08/2018



Signature

38 Scientific collaborator:

39 Roberta Nosedà, PhD

40 Lugano 20/08/2018

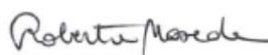

Signature

41 Clinical pharmacist:

42 Michela Pironi, MSc

43 Locarno 20/08/2018



Signature

44 Computer scientist:

45 Stefano Bruni, BSc

46 Bellinzona 20/08/2018

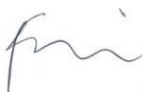

Signature

47

48 Local Principal Investigator at study site\*:

49 I have read and understood this trial protocol and agree to conduct the trial as set out in this study  
50 protocol, the current version of the World Medical Association Declaration of Helsinki, ICH-GCP  
51 guidelines or ISO 14155 norm and the local legally applicable requirements.

52

|                        |                                                                                                   |
|------------------------|---------------------------------------------------------------------------------------------------|
| Sites                  | Regional hospitals of Beata Vergine in Mendrisio and La Carità in Locarno                         |
| Principal investigator | Prof. Dr. med. Alessandro Ceschi (also Local Principal Investigator for both the two study sites) |

53

54 Lugano 20/08/2018



---

Place/Date

Signature

55

56 *\*Note:* In multicentre studies, this page must be individually signed by all participating Local Principal  
57 Investigators.

58

59

|     |                                                                                                    |           |
|-----|----------------------------------------------------------------------------------------------------|-----------|
| 60  | Table of Contents                                                                                  |           |
| 61  | <b>STUDY SYNOPSIS</b> .....                                                                        | <b>7</b>  |
| 62  | <b>ABBREVIATIONS</b> .....                                                                         | <b>13</b> |
| 63  | <b>STUDY SCHEDULE</b> .....                                                                        | <b>14</b> |
| 64  | <b>1. STUDY ADMINISTRATIVE STRUCTURE</b> .....                                                     | <b>15</b> |
| 65  | 1.1 Sponsor, Sponsor-Investigator .....                                                            | 15        |
| 66  | 1.2 Principal Investigator(s) .....                                                                | 15        |
| 67  | 1.3 Statistician ("Biostatistician").....                                                          | 15        |
| 68  | 1.4 Laboratory .....                                                                               | 15        |
| 69  | 1.5 Monitoring institution.....                                                                    | 15        |
| 70  | 1.6 Data Safety Monitoring Committee .....                                                         | 15        |
| 71  | 1.7 Any other relevant Committee, Person, Organisation, Institution .....                          | 15        |
| 72  | <b>2. ETHICAL AND REGULATORY ASPECTS</b> .....                                                     | <b>17</b> |
| 73  | 2.1 Study registration.....                                                                        | 17        |
| 74  | 2.2 Categorisation of study .....                                                                  | 17        |
| 75  | 2.3 Competent Ethics Committee (CEC) .....                                                         | 17        |
| 76  | 2.4 Competent Authorities (CA) .....                                                               | 17        |
| 77  | 2.5 Ethical Conduct of the Study.....                                                              | 17        |
| 78  | 2.6 Declaration of interest.....                                                                   | 17        |
| 79  | 2.7 Patient Information and Informed Consent .....                                                 | 17        |
| 80  | 2.8 Participant privacy and confidentiality .....                                                  | 18        |
| 81  | 2.9 Early termination of the study .....                                                           | 18        |
| 82  | 2.10 Protocol amendments.....                                                                      | 18        |
| 83  | <b>3. BACKGROUND AND RATIONALE</b> .....                                                           | <b>19</b> |
| 84  | 3.1 Background and Rationale .....                                                                 | 19        |
| 85  | 3.2 Investigational Product (treatment, device) and Indication.....                                | 19        |
| 86  | 3.3 Preclinical Evidence.....                                                                      | 19        |
| 87  | 3.4 Clinical Evidence to Date .....                                                                | 19        |
| 88  | 3.5 Dose Rationale / Medical Device: Rationale for the intended purpose in study (pre-market MD)19 |           |
| 89  | 3.6 Explanation for choice of comparator (or placebo).....                                         | 19        |
| 90  | 3.7 Risks / Benefits.....                                                                          | 20        |
| 91  | 3.8 Justification of choice of study population .....                                              | 20        |
| 92  | <b>4. STUDY OBJECTIVES</b> .....                                                                   | <b>21</b> |
| 93  | 4.1 Overall Objective .....                                                                        | 21        |
| 94  | 4.2 Primary Objective .....                                                                        | 21        |
| 95  | 4.3 Secondary Objectives.....                                                                      | 21        |
| 96  | 4.4 Safety Objectives.....                                                                         | 21        |
| 97  | <b>5. STUDY OUTCOMES</b> .....                                                                     | <b>22</b> |
| 98  | 5.1 Primary Outcome.....                                                                           | 22        |
| 99  | 5.2 Secondary Outcomes .....                                                                       | 22        |
| 100 | 5.3 Other Outcomes of Interest.....                                                                | 22        |
| 101 | 5.4 Safety Outcomes .....                                                                          | 22        |
| 102 | <b>6. STUDY DESIGN</b> .....                                                                       | <b>23</b> |
| 103 | 6.1 General study design and justification of design .....                                         | 23        |
| 104 | 6.2 Methods of minimising bias.....                                                                | 23        |
| 105 | 6.2.1 Randomisation.....                                                                           | 23        |

|     |            |                                                                                            |           |
|-----|------------|--------------------------------------------------------------------------------------------|-----------|
| 106 | 6.2.2      | Blinding procedures.....                                                                   | 23        |
| 107 | 6.2.3      | Other methods of minimising bias.....                                                      | 23        |
| 108 | 6.3        | Unblinding Procedures (Code break).....                                                    | 23        |
| 109 | <b>7.</b>  | <b>STUDY POPULATION.....</b>                                                               | <b>24</b> |
| 110 | 7.1        | Eligibility criteria.....                                                                  | 24        |
| 111 | 7.2        | Recruitment and screening.....                                                             | 24        |
| 112 | 7.3        | Assignment to study groups.....                                                            | 24        |
| 113 | 7.4        | Criteria for withdrawal / discontinuation of participants.....                             | 24        |
| 114 | <b>8.</b>  | <b>STUDY INTERVENTION.....</b>                                                             | <b>25</b> |
| 115 | 8.1        | Identity of Investigational Products (treatment / medical device).....                     | 25        |
| 116 | 8.1.1      | Experimental Intervention (treatment / medical device).....                                | 25        |
| 117 | 8.1.2      | Control Intervention (standard/routine/comparator treatment / medical device).....         | 25        |
| 118 | 8.1.3      | Packaging, Labelling and Supply (re-supply).....                                           | 25        |
| 119 | 8.1.4      | Storage Conditions.....                                                                    | 25        |
| 120 | 8.2        | Administration of experimental and control interventions.....                              | 25        |
| 121 | 8.2.1      | Experimental Intervention.....                                                             | 25        |
| 122 | 8.2.2      | Control Intervention.....                                                                  | 25        |
| 123 | 8.3        | Dose / Device modifications.....                                                           | 25        |
| 124 | 8.4        | Compliance with study intervention.....                                                    | 25        |
| 125 | 8.5        | Data Collection and Follow-up for withdrawn participants.....                              | 26        |
| 126 | 8.6        | Trial specific preventive measures.....                                                    | 26        |
| 127 | 8.7        | Concomitant Interventions (treatments).....                                                | 26        |
| 128 | 8.8        | Study Drug / Medical Device Accountability.....                                            | 26        |
| 129 | 8.9        | Return or Destruction of Study Drug / Medical Device.....                                  | 26        |
| 130 | <b>9.</b>  | <b>STUDY ASSESSMENTS.....</b>                                                              | <b>27</b> |
| 131 | 9.1        | Study flow chart(s) / table of study procedures and assessments.....                       | 27        |
| 132 | 9.2        | Assessments of outcomes.....                                                               | 27        |
| 133 | 9.2.1      | Assessment of primary outcome.....                                                         | 27        |
| 134 | 9.2.2      | Assessment of secondary outcomes.....                                                      | 27        |
| 135 | 9.2.3      | Assessment of other outcomes of interest.....                                              | 27        |
| 136 | 9.2.4      | Assessment of safety outcomes.....                                                         | 27        |
| 137 | 9.2.5      | Assessments in participants who prematurely stop the study.....                            | 28        |
| 138 | 9.3        | Procedures at each visit.....                                                              | 28        |
| 139 | 9.3.1      | Split into subtitles by type of visit.....                                                 | 28        |
| 140 | 9.3.2      | Split into subtitles by type of visit.....                                                 | 28        |
| 141 | 9.3.3      | Split into subtitles by type of visit.....                                                 | 28        |
| 142 | <b>10.</b> | <b>SAFETY.....</b>                                                                         | <b>29</b> |
| 143 | 10.1       | Drug studies.....                                                                          | 29        |
| 144 | 10.1.1     | Definition and assessment of (serious) adverse events and other safety related events..... | 29        |
| 145 | 10.1.2     | Reporting of serious adverse events (SAE) and other safety related events.....             | 29        |
| 146 | 10.1.3     | Follow up of (Serious) Adverse Events.....                                                 | 29        |
| 147 | 10.2       | Medical Device Category C studies.....                                                     | 30        |
| 148 | 10.2.1     | Definition and Assessment of (Serious) Adverse Events and other safety related events..... | 30        |
| 149 | 10.2.2     | Reporting of (Serious) Adverse Events and other safety related events.....                 | 30        |
| 150 | 10.2.3     | Follow up of (Serious) Adverse Events.....                                                 | 30        |
| 151 | 10.3       | Medical Device Category A studies.....                                                     | 30        |

|     |                                                                                  |           |
|-----|----------------------------------------------------------------------------------|-----------|
| 152 | 10.3.1 Definition and Assessment of safety related events.....                   | 30        |
| 153 | 10.3.2 Reporting of Safety related events.....                                   | 30        |
| 154 | 10.4 Assessment, notification and reporting on the use of radiation sources..... | 30        |
| 155 | <b>11. STATISTICAL METHODS .....</b>                                             | <b>31</b> |
| 156 | 11.1 Hypothesis.....                                                             | 31        |
| 157 | 11.2 Determination of Sample Size .....                                          | 31        |
| 158 | 11.3 Statistical criteria of termination of trial .....                          | 31        |
| 159 | 11.4 Planned Analyses.....                                                       | 31        |
| 160 | 11.4.1 Datasets to be analysed, analysis populations .....                       | 31        |
| 161 | 11.4.2 Primary Analysis.....                                                     | 31        |
| 162 | 11.4.3 Secondary Analyses.....                                                   | 31        |
| 163 | 11.4.4 Interim analyses .....                                                    | 32        |
| 164 | 11.4.5 Safety analysis .....                                                     | 32        |
| 165 | 11.4.6 Deviation(s) from the original statistical plan.....                      | 32        |
| 166 | 11.5 Handling of missing data and drop-outs.....                                 | 32        |
| 167 | <b>12. QUALITY ASSURANCE AND CONTROL .....</b>                                   | <b>33</b> |
| 168 | 12.1 Data handling and record keeping / archiving.....                           | 33        |
| 169 | 12.1.1 Case Report Forms .....                                                   | 33        |
| 170 | 12.1.2 Specification of source documents .....                                   | 33        |
| 171 | 12.1.3 Record keeping / archiving .....                                          | 34        |
| 172 | 12.2 Data management.....                                                        | 34        |
| 173 | 12.2.1 Data Management System .....                                              | 34        |
| 174 | 12.2.2 Data security, access and back-up.....                                    | 34        |
| 175 | 12.2.3 Analysis and archiving.....                                               | 34        |
| 176 | 12.2.4 Electronic and central data validation .....                              | 34        |
| 177 | 12.3 Monitoring.....                                                             | 34        |
| 178 | 12.4 Audits and Inspections.....                                                 | 34        |
| 179 | 12.5 Confidentiality, Data Protection.....                                       | 34        |
| 180 | 12.6 Storage of biological material and related health data .....                | 34        |
| 181 | <b>13. PUBLICATION AND DISSEMINATION POLICY .....</b>                            | <b>35</b> |
| 182 | <b>14. FUNDING AND SUPPORT .....</b>                                             | <b>36</b> |
| 183 | 14.1 Funding .....                                                               | 36        |
| 184 | 14.2 Other Support.....                                                          | 36        |
| 185 | <b>15. INSURANCE .....</b>                                                       | <b>36</b> |
| 186 | <b>16. REFERENCES .....</b>                                                      | <b>37</b> |
| 187 | <b>17. APPENDICES .....</b>                                                      | <b>38</b> |
| 188 |                                                                                  |           |
| 189 |                                                                                  |           |

## STUDY SYNOPSIS

|                                       |                                                                                                                                                                                                                                                                                                                                                                                                                                                                                                                                                                                                                                                                                                                                                                                                                                                                                                                                                                                                                                                                                                                                                                                                                                                                                                                                                                                                                                                                                                                                                                                                                                                                                                                                                                                                                                                                                                                                                                                                                                  |
|---------------------------------------|----------------------------------------------------------------------------------------------------------------------------------------------------------------------------------------------------------------------------------------------------------------------------------------------------------------------------------------------------------------------------------------------------------------------------------------------------------------------------------------------------------------------------------------------------------------------------------------------------------------------------------------------------------------------------------------------------------------------------------------------------------------------------------------------------------------------------------------------------------------------------------------------------------------------------------------------------------------------------------------------------------------------------------------------------------------------------------------------------------------------------------------------------------------------------------------------------------------------------------------------------------------------------------------------------------------------------------------------------------------------------------------------------------------------------------------------------------------------------------------------------------------------------------------------------------------------------------------------------------------------------------------------------------------------------------------------------------------------------------------------------------------------------------------------------------------------------------------------------------------------------------------------------------------------------------------------------------------------------------------------------------------------------------|
| <b>Sponsor / Sponsor-Investigator</b> | Ente Ospedaliero Cantonale                                                                                                                                                                                                                                                                                                                                                                                                                                                                                                                                                                                                                                                                                                                                                                                                                                                                                                                                                                                                                                                                                                                                                                                                                                                                                                                                                                                                                                                                                                                                                                                                                                                                                                                                                                                                                                                                                                                                                                                                       |
| <b>Study Title:</b>                   | Parallel group randomized controlled trial to assess the impact of medication reconciliation at hospital admission on healthcare outcomes.                                                                                                                                                                                                                                                                                                                                                                                                                                                                                                                                                                                                                                                                                                                                                                                                                                                                                                                                                                                                                                                                                                                                                                                                                                                                                                                                                                                                                                                                                                                                                                                                                                                                                                                                                                                                                                                                                       |
| <b>Short Title / Study ID:</b>        | Medication reconciliation at hospital admission                                                                                                                                                                                                                                                                                                                                                                                                                                                                                                                                                                                                                                                                                                                                                                                                                                                                                                                                                                                                                                                                                                                                                                                                                                                                                                                                                                                                                                                                                                                                                                                                                                                                                                                                                                                                                                                                                                                                                                                  |
| <b>Protocol Version and Date:</b>     | Version 4 (27/09/2019)                                                                                                                                                                                                                                                                                                                                                                                                                                                                                                                                                                                                                                                                                                                                                                                                                                                                                                                                                                                                                                                                                                                                                                                                                                                                                                                                                                                                                                                                                                                                                                                                                                                                                                                                                                                                                                                                                                                                                                                                           |
| <b>Trial registration:</b>            | Trial registered at <i>clinicaltrials.gov</i> (NCT03654963), and in the SNCTP on <i>kofam.ch</i> (via BASEC, ID 2018-01536).                                                                                                                                                                                                                                                                                                                                                                                                                                                                                                                                                                                                                                                                                                                                                                                                                                                                                                                                                                                                                                                                                                                                                                                                                                                                                                                                                                                                                                                                                                                                                                                                                                                                                                                                                                                                                                                                                                     |
| <b>Study category and Rationale</b>   | <p>Study category A: low/absent potential risk for patients exposed to the intervention.</p> <p>Information concerning patient medication history, gathered during medication reconciliation, will not imply any practical change on patients. This information will be used to correct potential omissions or other types of errors regarding the medication history originally obtained at admission. Medical doctors, not involved in the present study (to whom clinical pharmacists will communicate any type of discrepancy highlighted by medication reconciliation), will be in charge of deciding any change in drug therapy, directly interface with the patients and let them know about any changes in their pharmacotherapy.</p>                                                                                                                                                                                                                                                                                                                                                                                                                                                                                                                                                                                                                                                                                                                                                                                                                                                                                                                                                                                                                                                                                                                                                                                                                                                                                    |
| <b>Clinical Phase:</b>                | n.a.                                                                                                                                                                                                                                                                                                                                                                                                                                                                                                                                                                                                                                                                                                                                                                                                                                                                                                                                                                                                                                                                                                                                                                                                                                                                                                                                                                                                                                                                                                                                                                                                                                                                                                                                                                                                                                                                                                                                                                                                                             |
| <b>Background and Rationale:</b>      | <p><b>Background:</b> Medication reconciliation is a systematic process by which health care professionals obtain the most complete and accurate information about the drugs and other products regularly taken by patients (14). Internationally, the value of this procedure is mainly attributed to the reduction in the number of adverse drug events (ADEs), which can cause drug-related morbidity and mortality, as well as unnecessary health care costs (15-17). The WHO indicates medication reconciliation as a priority strategy for patient safety (14).</p> <p><b>Rationale:</b> As part of the <i>Progress! Pilot project Safe Pharmacotherapy at the interface points</i> (18), promoted by the Federal Office of Public Health, coordinated by the Swiss Patients Safety Foundation and held in several Swiss hospitals, medication reconciliation at hospital admission was introduced at the regional hospital Beata Vergine in Mendrisio, from 2014 to 2016. During this pilot project it was shown that medication reconciliation after obtaining the “Best Possible Medication History” (BPMH) by a pharmacist at hospital admission, in comparison with the standard medication history obtained by the physician at admission, reduced the number of clinically relevant drug discrepancies: among 100 patients included in the project, an average of 5.23 discrepancies per patient was highlighted, and 47% of all patients had a clinically relevant discrepancy potentially evolving in a serious ADE (19).</p> <p><b>Need for a trial:</b> A structured, well-established and practicable procedure of medication reconciliation that improves patient safety assuring a better quality of care at hospital admission might provide evidence that medication reconciliation could be a valuable intervention to be applied systematically in all EOC hospitals at admission, as well as subsequently potentially at the other hospital interfaces (during transfer and at hospital discharge).</p> |

|                                        |                                                                                                                                                                                                                                                                                                                                                                                                                                                                                                                                                                                                                                                                                                                                                                                                                                                                                                                                                                                                                                                                       |
|----------------------------------------|-----------------------------------------------------------------------------------------------------------------------------------------------------------------------------------------------------------------------------------------------------------------------------------------------------------------------------------------------------------------------------------------------------------------------------------------------------------------------------------------------------------------------------------------------------------------------------------------------------------------------------------------------------------------------------------------------------------------------------------------------------------------------------------------------------------------------------------------------------------------------------------------------------------------------------------------------------------------------------------------------------------------------------------------------------------------------|
| <b>Objective(s):</b>                   | <p>The purpose of this study is to evaluate whether obtaining a BPMH and performing medication reconciliation at hospital admission results in improving some specific healthcare outcomes.</p> <p><u>Primary study objective:</u> The study seeks primarily to determine if obtaining a BPMH and performing medication reconciliation, in comparison with the standard medication history, reduces the proportion of patients with one unplanned all-cause hospital visit (readmission and emergency department visit within 30 days after initial discharge).</p> <p><u>Secondary study objectives:</u> To assess if BPMH with medication reconciliation, in comparison with the standard medication history, reduces the incidence of adverse drug reactions (ADRs) during hospital stay, shortens length of stay, leads to a reduction in the use of hospital resources, and/or is associated with a decreased number of deaths.</p>                                                                                                                              |
| <b>Outcome(s):</b>                     | <p>Primary study outcome:<br/>Composite post-discharge healthcare use variable quantified as the proportion of patients with one unplanned all-cause hospital visit (readmission and emergency department visit within 30 days after initial discharge).</p> <p>Secondary study outcomes:</p> <ul style="list-style-type: none"> <li>•Incidence of ADRs during hospital stay</li> <li>•Length of hospital stay</li> <li>•Number of deaths during hospital stay</li> <li>•Number of resources used during hospital stay (laboratory tests, radiologic exams, echocardiography, electrocardiograms)</li> </ul>                                                                                                                                                                                                                                                                                                                                                                                                                                                          |
| <b>Study design:</b>                   | <p>Interventional<br/>Allocation: centralized simple randomization<br/>Intervention model: parallel assignment</p>                                                                                                                                                                                                                                                                                                                                                                                                                                                                                                                                                                                                                                                                                                                                                                                                                                                                                                                                                    |
| <b>Inclusion / Exclusion criteria:</b> | <p>Patients admitted to the inpatient wards of the two regional hospitals Beata Vergine in Mendrisio and La Carità in Locarno, fulfilling one of the following <u>inclusion</u> criteria, will be eligible for the study:</p> <ul style="list-style-type: none"> <li>-patients aged <math>\geq 85</math> years</li> <li>-patients with <math>&gt; 10</math> drugs at admission</li> </ul> <p>Patients with home care as well as patients from elderly homes, meeting the inclusion criteria, will be factored in the study population.<br/>Eligible patients will be included one-time only.</p> <p>The presence of any of the following <u>exclusion</u> criteria will lead to patient exclusion:</p> <ul style="list-style-type: none"> <li>-patients admitted to intensive care unit who do not reach inpatient wards</li> <li>-patients who are planned to stay within inpatient wards for less than 48 hours</li> <li>-patients who have been admitted to any of the EOC hospital wards within the previous 3 months and have been discharged at home</li> </ul> |



**Measurements and procedures:**

Procedure: Eligible patients, randomized within the intervention arm, will receive medication reconciliation according to the following steps:

- 1) The pharmacy assistant will obtain the BPMH by compiling a comprehensive list of the medications the patient is taking and details about how the drugs are taken. In order to confirm the accuracy of the history, the pharmacy assistant will use at least two sources of information, one of which being, when possible, the interview with the patient and/or family members, in addition to referral letters, prescriptions and drug lists from primary care centres, and other.
- 2) The clinical pharmacist will reconcile BPMH with prescribed medicines and, to resolve unclear or ambiguous discrepancies between the two lists and/or to propose any adaptations of the pharmacotherapy, the clinical pharmacist will refer to the medical doctor.
- 3) The medical doctor will decide potential changes in pharmacotherapy and communicate them to the patient providing complete information on medicines.

Medication reconciliation will be applied at hospital admission accordingly to the following time-schedules:

- A) Patients admitted to the inpatient ward from Monday 7 am to Friday 12 pm: medication reconciliation within 48 hours
- B) Patients admitted to the inpatient ward from Friday 12 pm to Monday 7 am: medication reconciliation within 48 hours, calculated starting from Monday morning at 7 am
- C) Patients admitted from the 12 pm of the pre-holiday or during holidays: medication reconciliation within 48 hours calculated from the first non-holiday day at 7 am

Sampling: A centralized simple randomization list to allocate 1:1 included patients in either the intervention or the control groups will be generated by the clinical trial unit (CTU) of the EOC.

Measurements:

- An *ad hoc* database (the case report form, CRF) will be created by the Information and Communication Technology (ICT) unit of the EOC to systematically record outcome measurements, thus enhancing data quality, reducing the amount of missing or incomplete data, inaccuracies and excessive variability.
- Pharmacy assistants and clinical pharmacists will have access to the hospital electronic medical record (EMR) system to register and systematically document the medication reconciliation process. For such reason, GECO (Gestione COordinata del paziente), the tool developed and used within the EOC to manage EMRs, has been adapted accordingly by the ICT.
- Data quality will be promoted through the training of the pharmacy assistants involved in medication reconciliation: clinical pharmacists-held training sessions are ongoing to inform and explain the specific changes applied in GECO for the registration of the medications' list.
- To measure the incidence of ADRs developed by patients during the hospital stay, the active pharmacovigilance system currently in use at the Centro Regionale di Farmacovigilanza del Canton Ticino, will be exploited. EMRs identified through this system and referring to patients from both the two study sites, aged  $\geq 85$  years or with more than 10 medications at admission, will be manually validated (to discard false positive cases). Subsequently, ADRs will be categorized as not serious or serious (according to the WHO seriousness criteria, for resulting in death, being life threatening, prolonging hospitalization, resulting in persistent disability or incapacity and other). Outcome assessor will be masked to group allocation. At the end of the analysis, ADRs will be matched to either the intervention or the control group.
- Emergency department visits, readmissions, the length of hospital stay and deaths during hospitalization, will be retrieved from administrative sources (already in use within the EOC for other purposes) with the support of the ICT via an appropriate software able to select the EMRs of interest (referred to included patients).
- For the quantitative evaluation of the resources used during

|                                               |                                                                                                                                                                                                                                                                                                                                                                                 |
|-----------------------------------------------|---------------------------------------------------------------------------------------------------------------------------------------------------------------------------------------------------------------------------------------------------------------------------------------------------------------------------------------------------------------------------------|
| <b>Study Product / Intervention:</b>          | n.a.                                                                                                                                                                                                                                                                                                                                                                            |
| <b>Control Intervention (if applicable):</b>  | Patients of the control group will not receive BPMH with medication reconciliation at admission. The standard physician-acquired medication history will be performed as usual.                                                                                                                                                                                                 |
| <b>Number of Participants with Rationale:</b> | N=1890, considering: <ul style="list-style-type: none"> <li>• Power 0.80</li> <li>• Significance level 0.05</li> <li>• Expected subsequent hospital visit rate in the control group, 30%</li> <li>• Difference in subsequent hospital visit rates between the control and the intervention group considered clinically relevant, 6%</li> <li>• Patient drop-out, 10%</li> </ul> |
| <b>Study Duration:</b>                        | 14 months for the study site La Carità in Locarno, 13 months for the study site Beata Vergine in Mendrisio                                                                                                                                                                                                                                                                      |
| <b>Study Schedule:</b>                        | 05/11/2018 – 31/01/2020                                                                                                                                                                                                                                                                                                                                                         |

|                         |                                                                                                                                                                                                                                                                                                                                                                                                                                                                                                                                                                                                                                                                                                                                                                                                                                                                                                                                                                                                                                                                                                                                                                                                                                                                                                                                                                                                                                                                                                                                                                                                                                                                                                                                                                                                                                                                                                                                                                                                                                                                                                                                   |
|-------------------------|-----------------------------------------------------------------------------------------------------------------------------------------------------------------------------------------------------------------------------------------------------------------------------------------------------------------------------------------------------------------------------------------------------------------------------------------------------------------------------------------------------------------------------------------------------------------------------------------------------------------------------------------------------------------------------------------------------------------------------------------------------------------------------------------------------------------------------------------------------------------------------------------------------------------------------------------------------------------------------------------------------------------------------------------------------------------------------------------------------------------------------------------------------------------------------------------------------------------------------------------------------------------------------------------------------------------------------------------------------------------------------------------------------------------------------------------------------------------------------------------------------------------------------------------------------------------------------------------------------------------------------------------------------------------------------------------------------------------------------------------------------------------------------------------------------------------------------------------------------------------------------------------------------------------------------------------------------------------------------------------------------------------------------------------------------------------------------------------------------------------------------------|
| <b>Investigator(s):</b> | <p>Prof. Dr. med. Alessandro Ceschi<br/> Medical and scientific director<br/> Istituto di Scienze Farmacologiche della Svizzera Italiana<br/> Clinica di Farmacologia e Tossicologia Clinica<br/> Ente Ospedaliero Cantonale<br/> Via Tesserete 46<br/> 6903 Lugano – Switzerland<br/> Email: <a href="mailto:alessandro.ceschi@eoc.ch">alessandro.ceschi@eoc.ch</a><br/> Telephone: +41 91 8116863</p> <p>Prof. Dr. med. Paolo Ferrari<br/> Chief Medical Officer<br/> Direzione Generale<br/> Ente Ospedaliero Cantonale<br/> Viale Officina 3<br/> 6500 Bellinzona – Switzerland<br/> Email: <a href="mailto:paolo.ferrari@eoc.ch">paolo.ferrari@eoc.ch</a><br/> Telephone: +41 91 8111436</p> <p>PD Dr. med. Alberto Pagnamenta<br/> Head of the Clinical Epidemiology and Biostatistics Unit<br/> Area Formazione Accademica, Ricerca e Innovazione<br/> Ente Ospedaliero Cantonale<br/> Viale Officina 3<br/> 6500 Bellinzona - Switzerland<br/> Email: <a href="mailto:alberto.pagnamenta@eoc.ch">alberto.pagnamenta@eoc.ch</a><br/> Telephone: +41 91 8113429</p> <p>Roberta Nosedà, PhD<br/> Scientific collaborator<br/> Istituto di Scienze Farmacologiche della Svizzera Italiana<br/> Clinica di Farmacologia e Tossicologia Clinica<br/> Ente Ospedaliero Cantonale<br/> Via Tesserete 46<br/> 6903 Lugano – Switzerland<br/> Email: <a href="mailto:roberta.nosedà@eoc.ch">roberta.nosedà@eoc.ch</a><br/> Telephone: +41 91 8116300</p> <p>Michela Pironi, MSc<br/> Clinical pharmacist<br/> Istituto di Scienze Farmacologiche della Svizzera Italiana<br/> Ente Ospedaliero Cantonale<br/> Ospedale Regionale di Locarno<br/> Via all’Ospedale 1<br/> 6600 Locarno – Switzerland<br/> Email: <a href="mailto:michela.pironi@eoc.ch">michela.pironi@eoc.ch</a><br/> Telephone: +41 91 8114561</p> <p>Stefano Bruni, BSc<br/> Computer scientist<br/> Informatica e Tecnologia della Comunicazione<br/> Ente Ospedaliero Cantonale<br/> Viale Stefano Franscini 4<br/> 6500 Bellinzona – Switzerland<br/> Email: <a href="mailto:stefano.bruni@eoc.ch">stefano.bruni@eoc.ch</a><br/> Telephone: +41 91 8111364</p> |
| <b>Study Centre(s):</b> | Regional hospitals Beata Vergine in Mendrisio and La Carità in Locarno                                                                                                                                                                                                                                                                                                                                                                                                                                                                                                                                                                                                                                                                                                                                                                                                                                                                                                                                                                                                                                                                                                                                                                                                                                                                                                                                                                                                                                                                                                                                                                                                                                                                                                                                                                                                                                                                                                                                                                                                                                                            |

|                                           |                                                                                                                                                                                                                                                                                                                                                                                                                                                                                                                                                                                                                                                                                                                                                                                                                                                                                                                                                                                                                                                                                                                                                                                                                                                                                                                                                                                                                                                                                                                                                                                                                                                                                                                                                                                                                                                                                                                                                                                                                                                                                                                                                                                                                                                                                                                                                                                                                                                                                                                                                     |
|-------------------------------------------|-----------------------------------------------------------------------------------------------------------------------------------------------------------------------------------------------------------------------------------------------------------------------------------------------------------------------------------------------------------------------------------------------------------------------------------------------------------------------------------------------------------------------------------------------------------------------------------------------------------------------------------------------------------------------------------------------------------------------------------------------------------------------------------------------------------------------------------------------------------------------------------------------------------------------------------------------------------------------------------------------------------------------------------------------------------------------------------------------------------------------------------------------------------------------------------------------------------------------------------------------------------------------------------------------------------------------------------------------------------------------------------------------------------------------------------------------------------------------------------------------------------------------------------------------------------------------------------------------------------------------------------------------------------------------------------------------------------------------------------------------------------------------------------------------------------------------------------------------------------------------------------------------------------------------------------------------------------------------------------------------------------------------------------------------------------------------------------------------------------------------------------------------------------------------------------------------------------------------------------------------------------------------------------------------------------------------------------------------------------------------------------------------------------------------------------------------------------------------------------------------------------------------------------------------------|
| <p><b>Statistical Considerations:</b></p> | <p><u>Data Analysis:</u> Quantitative data will be summarized as mean with standard deviation (SD) or as median with interquartile range (IQR) as appropriate. Qualitative data will be presented as absolute numbers with percentages. Comparisons of data between the two populations (patients with medication reconciliation <i>versus</i> patients without, corresponding to usual care) will be performed with the Student t-test, Mann-Whitney test, chi-squared test, or Fisher exact test, as appropriated. Primary endpoint is a composite post-discharge healthcare use variable quantified as the proportion of patients with one unplanned all-cause hospital visit (readmission and emergency department visit within 30 days after initial discharge). Subsequent hospital visit rates will be compared between groups with the chi-squared test or the Fisher exact test as appropriate. All tests will be two-sided and p-value &lt; 0.05 will be considered to be statistically significant. Moreover, we will perform a time to event analysis with the Kaplan-Meier method. In this analysis the outcome of interest will be the previously described composite post-discharge healthcare use variable. Time to event curves of patients with and without medication reconciliation will be presented, and thereafter compared with the log-rank test. Unadjusted and adjusted hazard ratios with the corresponding 95% confidence intervals (CI) will be calculated using a Cox proportional hazard model. The proportional hazard assumption will be verified graphically and with the Schoenfeld test. If a variable will violate the proportional hazard assumption, this variable will be used to stratify the Cox model. All statistical analyses will be performed with Stata version 15 (StataCorp LP, College Station, TX, USA).</p> <p><u>Sample size assessment:</u> Based on previous studies (20) and on the EOC electronic database, we will expect to observe a positive composite variable in about 30% of patients in the control group. To detect a clinically relevant difference (set at 6%) in this composite variable between intervention and control group, with a type I error of 0.05 and a power of 0.80, we determined a sample size of 1718 patients. Taking into account a possible drop-out for different reasons of about 10%, we calculated the definitive sample size of 1890 patients. Sample size calculation was performed with PASS version 15.0.3 (NCSS, LCC, Kaysville, Utah, USA).</p> |
| <p><b>GCP Statement:</b></p>              | <p>This study will be conducted in compliance with the protocol, the current version of the Declaration of Helsinki, the ICH-GCP or ISO EN 14155 (as far as applicable) as well as all national legal and regulatory requirements.</p>                                                                                                                                                                                                                                                                                                                                                                                                                                                                                                                                                                                                                                                                                                                                                                                                                                                                                                                                                                                                                                                                                                                                                                                                                                                                                                                                                                                                                                                                                                                                                                                                                                                                                                                                                                                                                                                                                                                                                                                                                                                                                                                                                                                                                                                                                                              |

191  
192

194 **ABBREVIATIONS**

|       |                                                                                                                                                           |
|-------|-----------------------------------------------------------------------------------------------------------------------------------------------------------|
| BASEC | Business Administration System for Ethical Committees,<br>( <a href="https://submissions.swissethics.ch/en/">https://submissions.swissethics.ch/en/</a> ) |
| CEC   | Competent Ethics Committee                                                                                                                                |
| CRF   | Case Report Form                                                                                                                                          |
| ClinO | Ordinance on Clinical Trials in Human Research ( <i>in German: KlinV, in French: OClin, in Italian: OSRUm</i> )                                           |
| GCP   | Good Clinical Practice                                                                                                                                    |
| Ho    | Null hypothesis                                                                                                                                           |
| H1    | Alternative hypothesis                                                                                                                                    |
| HRA   | Federal Act on Research involving Human Beings ( <i>in German: HFG, in French: LRH, in Italian: LRUm</i> )                                                |
| IIT   | Investigator-initiated Trial                                                                                                                              |
| ISO   | International Organisation for Standardisation                                                                                                            |
| ITT   | Intention to treat                                                                                                                                        |
| ICH   | International Conference on Harmonization                                                                                                                 |
| PI    | Principal Investigator                                                                                                                                    |
| SDV   | Source Data Verification                                                                                                                                  |
| SOP   | Standard Operating Procedure                                                                                                                              |
| TMF   | Trial Master File                                                                                                                                         |
| WHO   | World Health Organization                                                                                                                                 |
| ICTRP | International Clinical Trial Registry Portal Platform                                                                                                     |
| SNCTP | Swiss National Clinical Trial Portal                                                                                                                      |
| EOC   | Ente Ospedaliero Cantonale                                                                                                                                |
| ISFSI | Istituto di Scienze Farmacologiche della Svizzera Italiana                                                                                                |
| ADE   | Adverse Drug Event                                                                                                                                        |
| BPMH  | Best Possible Medication History                                                                                                                          |
| ICT   | Information and Communication Technology                                                                                                                  |
| CTU   | Clinical Trial Unit                                                                                                                                       |
| EMR   | Electronic Medical Record                                                                                                                                 |
| GECCO | GEstione Coordinata del paziente                                                                                                                          |
| ADR   | Adverse Drug Reaction                                                                                                                                     |
| SD    | Standard Deviation                                                                                                                                        |
| IQR   | Interquartile Range                                                                                                                                       |

197 **STUDY SCHEDULE**

|                             | Enrolment | Allocation | Post-allocation                           |   |   | Close-out |           |
|-----------------------------|-----------|------------|-------------------------------------------|---|---|-----------|-----------|
| TIMEPOINT                   | 0         | 0          | Within 48 h from admission (sequentially) |   |   | 30 days   | 12 months |
| ENROLMENT:                  |           |            |                                           |   |   |           |           |
| Eligibility screen          | X         |            |                                           |   |   |           |           |
| Allocation                  |           | X          |                                           |   |   |           |           |
| INTERVENTIONS:              |           |            |                                           |   |   |           |           |
| Standard medication history | X         |            |                                           |   |   |           |           |
| BPMH*                       |           |            | X                                         |   |   |           |           |
| MedRec**                    |           |            |                                           | X |   |           |           |
| Patient communication       |           |            |                                           |   | X |           |           |
| OUTCOME MEASURES:           |           |            |                                           |   |   |           |           |
| N. of readmissions          |           |            |                                           |   |   | X         |           |
| N. of ED*** visits          |           |            |                                           |   |   | X         |           |
| Death (yes/no)              |           |            |                                           |   |   |           | X         |
| Length of hospital stay     |           |            |                                           |   |   |           | X         |
| N. of ADRs****              |           |            |                                           |   |   |           | X         |
| N. of resources used        |           |            |                                           |   |   |           | X         |
| N. of discrepancies         |           |            |                                           |   |   |           | X         |
| MedRec duration             |           |            |                                           |   |   |           | X         |

198 \*Best Possible Medication History

199 \*\*Medication Reconciliation

200 \*\*\*Emergency Department

201 \*\*\*\*Adverse Drug Reactions

202

203 **1. STUDY ADMINISTRATIVE STRUCTURE**

204 **1.1 Sponsor, Sponsor-Investigator**

205 Sponsor:  
206 Ente Ospedaliero Cantonale  
207 *Contact details:*  
208 Viale Officina 3  
209 6501 Bellinzona - Switzerland  
210 Email: [direzione.generale@eoc.ch](mailto:direzione.generale@eoc.ch)  
211 Telephone: +41 91 8111301

212 **1.2 Principal Investigator(s)**

213 Principal Investigator:  
214 Prof. Dr. med. Alessandro Ceschi  
215 *Contact details:*  
216 Via Tesserete 46  
217 6903 Lugano - Switzerland  
218 Email: [alessandro.ceschi@eoc.ch](mailto:alessandro.ceschi@eoc.ch)  
219 Telephone: +41 91 8116863

220 **1.3 Statistician ("Biostatistician")**

221 PD Dr. med. Alberto Pagnamenta  
222 *Contact details:*  
223 Via Turconi 23  
224 6850 Mendrisio - Switzerland  
225 Email: [alberto.pagnamenta@eoc.ch](mailto:alberto.pagnamenta@eoc.ch)  
226 Telephone: +41 91 8113429

227 **1.4 Laboratory**

228 n.a.

229 **1.5 Monitoring institution**

230 The Sponsor will monitor the study

231 **1.6 Data Safety Monitoring Committee**

232 n.a.

233 **1.7 Any other relevant Committee, Person, Organisation, Institution**

234 Prof. Dr. med. Paolo Ferrari, Chief Medical Officer of the EOC  
235 *Contact details:*  
236 Viale Officina 3  
237 6500 Bellinzona – Switzerland  
238 Email: [paolo.ferrari@eoc.ch](mailto:paolo.ferrari@eoc.ch)  
239 Telephone: +41 91 8111436

240  
241 Roberta Nosedà, PhD, scientific collaborator  
242 *Contact details:*  
243 Via Tesserete 46  
244 6903 Lugano – Switzerland  
245 Email: [roberta.nosedà@eoc.ch](mailto:roberta.nosedà@eoc.ch)  
246 Telephone: +41 91 8116300

247  
248 Michela Pironi, MSc, clinical pharmacist  
249 *Contact details:*  
250 Via all'Ospedale 1  
251 6600 Locarno – Switzerland  
252 Email: [michela.pironi@eoc.ch](mailto:michela.pironi@eoc.ch)  
253 Telephone: +41 91 8114561

254

255 Stefano Bruni, BSc, computer scientist  
256 *Contact details:*  
257 Viale Stefano Franscini 4  
258 6500 Bellinzona – Switzerland  
259 Email: [stefano.bruni@eoc.ch](mailto:stefano.bruni@eoc.ch)  
260 Telephone: +41 91 8111364  
261  
262



263 **2. ETHICAL AND REGULATORY ASPECTS**

264 The decision of the CEC concerning the conduct of the study will be made in writing to the Sponsor  
265 and the Principal Investigator before commencement of this study. The clinical study can only begin  
266 once approval from authorities has been received. Any additional requirements imposed by the  
267 authorities shall be implemented.

268 **2.1 Study registration**

269 We intend to register the study at *clinicaltrials.gov* and at *kofam.ch*  
270 The study has been registered at the SNCTP via BASEC.

271 **2.2 Categorisation of study**

272 Study category A: low/absent potential risk for patients exposed to the intervention.  
273 Information concerning patient medication history, gathered during medication reconciliation, will not  
274 imply any practical change on patients. This information will be used to correct potential omissions or  
275 other types of errors regarding the medication history originally obtained at admission. Medical doctors,  
276 not involved in the present study (to whom clinical pharmacists will communicate any type of  
277 discrepancy highlighted by medication reconciliation), will be in charge of deciding any change in drug  
278 therapy, directly interface with the patients and let them know about any changes in their  
279 pharmacotherapy.

280 **2.3 Competent Ethics Committee (CEC)**

281 PD Dr. med. Alessandro Ceschi ensures that approval from the CEC is sought for the clinical study.  
282 No changes will be made to the protocol without prior Principal Investigator and CEC approval.

283 **2.4 Competent Authorities (CA)**

284 n.a.

285 **2.5 Ethical Conduct of the Study**

286 The study will be carried out in accordance to the protocol and with principles enunciated in the  
287 current version of the Declaration of Helsinki, the guidelines of Good Clinical Practice (GCP) issued by  
288 ICH, and the Swiss Law. The CEC will receive the final report and be informed about study stop/end in  
289 agreement with local requirements.

290 **2.6 Declaration of interest**

291 There are no conflict of interest to declare.

292 **2.7 Patient Information and Informed Consent**

293 The investigators will explain to each participant randomized within the intervention arm the nature of  
294 the study, its purpose, the procedures involved, the expected duration, the potential risks and benefits  
295 and any discomfort it may entail. These participants will be informed that the participation in the study  
296 is voluntary and that he/she may withdraw from the study at any time and that withdrawal of consent  
297 will not affect his/her subsequent medical assistance and treatment.

298 The participant must be informed that his/her medical records may be examined by authorised  
299 individuals other than their treating physician.

300 All participants randomized within the intervention arm will be provided a participant information sheet  
301 and a consent form describing the study and providing sufficient information for participant to make an  
302 informed decision about their participation in the study.

303 The participant should read and consider the statement before signing and dating the informed  
304 consent form, and should be given a copy of the signed document. The consent form must also be  
305 signed and dated by the investigator (or his designee) at the same time as the participant sign, and it  
306 will be retained as part of the study records.

307 We ask for exemption from obtaining informed consent from patients randomized within the control  
308 arm, for the following reasons:

- 309 - obtaining informed consent would introduce a substantial methodological bias with decreased study  
310 results' validity;
- 311 - all data obtained from the control group are already recorded within the EOC for other, mainly  
312 administrative, purposes and no extra data will be obtained only for study purposes;

313  
314 - as the present study received an internal EOC funding only for increasing the percentage of  
315 employment of pharmacy assistants who will obtain the BPMH, obtaining informed consent from  
316 patients randomized to the control group would imply significant organizational difficulties due to the  
317 lack of available resources;  
318 Instead of performing a simple randomized controlled trial (RCT) (randomization at patient level), a  
319 cluster randomized trial (CRT) (randomization at hospital level) would be an interesting alternative  
320 design. However CRT is affected by the following technical and ethical limitations:  
321 - CRT usually needs a larger sample size than RCT: data in the same hospital are not independent  
322 (correlated). A larger sample size needs more human resources and costs to perform the study;  
323 - to take into account the hierarchical nature of the data permitting to perform a cluster analysis (the  
324 reference standard analysis in this situation) a minimum number of cluster is required, and with only  
325 four clusters (hospitals) in our study this minimum is not reached;  
326 - the ethical issue in the control group with RCT will remain the same with CRT, because we will  
327 gather data from patients in the control hospitals without their formal consent.  
328 A further option could involve emergency physicians obtaining informed consent from patients fulfilling  
329 the inclusion criteria before randomization. However, this approach is not feasible as it comes along  
330 with several clinical and organizational critical issues:  
331 - it would cause a delay in the emergency physician work, which is challenging and largely  
332 unpredictable, since it is a rather time-consuming procedure, which requires that patient has sufficient  
333 time to make his/her own decision;  
334 - it would imply that all emergency physicians, as well as ward physicians, should know in detail the  
335 study procedures and should be adequately educated on the medication reconciliation process, even  
336 if they would otherwise not be involved in the study.  
337

## 338 **2.8 Participant privacy and confidentiality**

339 Participants' right to privacy will be upheld by the Sponsor and anonymity of the participants will be  
340 guaranteed when presenting the data at scientific meetings or publishing them in scientific journals.  
341 Individual subject medical information obtained as a result of this study is considered confidential and  
342 disclosure to third parties is prohibited. Subject confidentiality will be further ensured by utilising  
343 subject identification code numbers in computer files.  
344 The CEC has the authority to require direct access to parts of the medical records relevant to the  
345 study, including participants' medical history, for data verification purposes.

## 346 **2.9 Early termination of the study**

347 The Sponsor or the Principal Investigator may terminate the study prematurely for failure to meet  
348 expected enrolment goals and any other administrative reason.

## 349 **2.10 Protocol amendments**

350 The Principal Investigator is the only person who is allowed to amend the protocol. All amendments  
351 will be documented, dated and signed by the Principal Investigator.  
352 Substantial amendments will only be implemented after approval of the CEC.  
353 Under emergency circumstances, deviations from the protocol to protect the rights, safety and well-  
354 being of human subjects may proceed without prior approval of the CEC. Such deviations will be  
355 documented and reported to the CEC as soon as possible.

356  
357

### 358 3. BACKGROUND AND RATIONALE

#### 359 3.1 Background and Rationale

360 Background: Medication reconciliation is a systematic process by which health care professionals  
361 obtain the most complete and accurate information about the drugs and other products regularly taken  
362 by patients. Aiming at reducing, and possibly avoiding, pharmacological errors (e.g. omissions,  
363 additions, dosing errors, drug interactions), medication reconciliation should be performed at all  
364 hospital interfaces, especially when new drugs are prescribed or pharmacological therapies are  
365 transcribed (14).

366 Internationally, the value of this procedure is mainly attributed to the reduction in the number of  
367 adverse drug events (ADEs), which can cause drug-related morbidity and mortality, as well as  
368 unnecessary health care costs (15-17). It is opinion of the WHO that most of ADEs happen due to a  
369 suboptimal communication between healthcare providers and patients at hospital interfaces  
370 (admission, transfer, discharge). Moreover, the WHO points out that 67% of drug histories contain one  
371 or more errors and 30-80% of the patients have a discrepancy between the drugs taken at home and  
372 those prescribed in the hospital (14, 15).

373 Rationale: As part of the *Progress! Pilot project Safe Pharmacotherapy at the interface points (18)*,  
374 promoted by the Federal Office of Public Health, coordinated by the Swiss Patients Safety Foundation  
375 and held in several Swiss hospitals, medication reconciliation at hospital admission was introduced at  
376 the regional hospital Beata Vergine in Mendrisio, from 2014 to 2016. During this pilot project it was  
377 shown that medication reconciliation after obtaining the "Best Possible Medication History" (BPMH) by  
378 a pharmacist at hospital admission, in comparison with the standard medication history obtained by  
379 the physician at admission, reduced the number of clinically relevant drug discrepancies: among 100  
380 patients included in the project, an average of 5.23 discrepancies per patient was highlighted, and  
381 47% of all patients had a clinically relevant discrepancy potentially evolving in a serious ADE (19).

382 Need for a trial: A structured, well-established and practicable procedure of medication reconciliation  
383 that improves patient safety assuring a better quality of care at hospital admission might provide  
384 evidence that medication reconciliation could be a valuable intervention to be applied systematically in  
385 all EOC hospitals at admission, as well as subsequently potentially at the other hospital interfaces  
386 (during transfer and at hospital discharge).

#### 387 3.2 Investigational Product (treatment, device) and Indication

388 n.a.

#### 389 3.3 Preclinical Evidence

390 n.a.

#### 391 3.4 Clinical Evidence to Date

392 Up-to-date there are no systematic reviews and meta-analyses specifically assessing the impact of  
393 medication reconciliation performed at admission by pharmacy assistants and clinical pharmacists on  
394 clinically relevant healthcare outcomes. In literature, the most relevant data presented as systematic  
395 review are those published by *Cheema E et al. (20)*, where pharmacist-led interventions consisted in  
396 medication reconciliation, tailored patient counselling, and provision of telephonic advice to patient at  
397 post-hospital discharge. Among the randomized controlled trials included in the meta-analysis,  
398 pharmacist-led interventions were effective in reducing medication discrepancies, however, they did  
399 not lead to a significant reduction in healthcare utilization (termed as utilization of healthcare resources  
400 following drug-related emergency department visits or hospital readmissions).

#### 401 3.5 Dose Rationale / Medical Device: Rationale for the intended purpose in 402 study (pre-market MD)

403 n.a.

#### 404 3.6 Explanation for choice of comparator (or placebo)

405 The comparator chosen for this study is the "no intervention", meaning that patients allocated in the  
406 control group will not receive BPMH and medication reconciliation at admission. For these patients,  
407 the standard physician-acquired drug history will be performed as usual.

408 **3.7 Risks / Benefits**

409 Potential risk for patients exposed to medication reconciliation is almost absent.  
410 Once the clinical pharmacist has reviewed in detail the patient's medication list prescribed after  
411 obtaining the standard drug history and compared this with the medication list obtained after BPMH, if  
412 any discrepancy is detected, it will be discussed with the patient's physician who will finally define the  
413 pharmacotherapy and inform the patient if a change is made.

414 **3.8 Justification of choice of study population**

415 Older patients  $\geq 85$  years and/or with more than 10 medications taken at home have been identified by  
416 our previous pilot study (see above) as at particular risk for medication discrepancies. Furthermore,  
417 older age and polypharmacy have also been identified by other studies as risk factors for  
418 discrepancies.

419 A randomized controlled trial performed by *Gillespie U et al. (21)*, in patients 80 years or older,  
420 showed that pharmacist intervention (on admission, to ensure a correct medication list) is more  
421 effective than the standard care (without pharmacist involvement in the health care team at the ward  
422 level), with a 16% reduction in all visits to the hospital, and a 47% reduction in the visits to the  
423 emergency department, at 12 months follow-up.

424

425

426 **4. STUDY OBJECTIVES**

427 **4.1 Overall Objective**

428 The purpose of this study is to evaluate whether obtaining a BPMH and performing medication  
429 reconciliation at hospital admission results in improving some specific clinically relevant healthcare  
430 outcomes.

431 **4.2 Primary Objective**

432 The study seeks primarily to determine if obtaining a BPMH and performing medication reconciliation,  
433 in comparison with the standard medication history, reduces the proportion of patients with  
434 subsequent unplanned all-cause hospital visits (readmissions and emergency department visits within  
435 30 days after initial discharge).

436 **4.3 Secondary Objectives**

437 To assess if medication reconciliation, in comparison with the standard medication history, reduces  
438 the incidence of adverse drug reactions (ADRs) during hospital stay, shortens length of stay, leads to  
439 a reduction in the use of hospital resources, and/or is associated to a decreased number of deaths.

440 **4.4 Safety Objectives**

441 n.a.

442

443 **5. STUDY OUTCOMES**

444 **5.1 Primary Outcome**

445 The primary study outcome will be the composite post-discharge healthcare use variable quantified as  
446 the proportion of patients with unplanned all-cause hospital visits (including readmissions and  
447 emergency department visits within 30 days after initial discharge).

448 These data will be retrieved from administrative data sources (already in use within the EOC for other  
449 purposes) with the support of the ICT via an appropriate software able to select the electronic medical  
450 records (EMRs) of interest (referred to included patients).

451 **5.2 Secondary Outcomes**

452 Secondary study outcomes will be: 1) incidence of ADRs during hospital stay; 2) length of hospital  
453 stay; 3) number of patients died during hospital stay; 4) number of resources used during hospital stay  
454 (laboratory tests, radiologic exams, echocardiography, and electrocardiograms). All these data will be  
455 measured at the study close-out (12 months).

456 To measure the incidence of ADRs developed by patients during the hospital stay, the active  
457 pharmacovigilance system currently in use at the Centro Regionale di Farmacovigilanza del Canton  
458 Ticino, will be exploited. EMRs identified through this system and referring to patients from both the  
459 two study sites, aged  $\geq 85$  years or with more than 10 medications at admission, will be manually  
460 validated (to discard false positive cases). Subsequently, ADRs will be categorized as not serious or  
461 serious (according to the WHO seriousness criteria, for resulting in death, being life threatening,  
462 prolonging hospitalization, resulting in persistent disability or incapacity and other). Outcome assessor  
463 will be masked to group allocation. At the end of the analysis, ADRs will be matched to either the  
464 intervention or the control group.

465 Length of hospital stay and number of deaths during hospitalization will be retrieved from  
466 administrative data sources (already in use within the EOC for other purposes) with the support of the  
467 ICT.

468 For the quantitative evaluation of the resources used during hospitalization, the database already  
469 existing for the *Choosing Wisely EOC* project will be used for the counting of laboratory tests, whereas  
470 specific softwares will be applied to extrapolate information routinely registered by the EOC for  
471 administrative reasons on radiographic exams as well as echocardiography and electrocardiograms.

472 **5.3 Other Outcomes of Interest**

473 n.a.

474 **5.4 Safety Outcomes**

475 n.a.

476

477 **6. STUDY DESIGN**

478 **6.1 General study design and justification of design**

479 The study design is parallel group, two-arm trial with 1:1 allocation.

480 The two arms are justified as we have two parallel groups, one for the intervention (MedRec) and the  
481 other as the control group. The 1:1 allocation is justified in order to have a comparable number of  
482 subjects included in both groups.

483 **6.2 Methods of minimising bias**

484 **6.2.1 Randomisation**

485 Simple randomization across the two study sites will be centralized: a unique list of randomization will  
486 be generated by the clinical trial unit (CTU) of the EOC with an *ad hoc* software, and patients will be  
487 allocated 1:1 in either the intervention or the control group.

488 **6.2.2 Blinding procedures**

489 Open-label trial (pharmacy assistants and clinical pharmacists along with study participants  
490 randomized to the intervention group will be aware of the study). For study participants allocated  
491 within the control group we are asking for the exemption from obtaining informed consent for the  
492 reasons stated above (please refer to section 2.7).

493 Outcome assessors and data analysts will be blinded.

494 **6.2.3 Other methods of minimising bias**

495 n.a.

496 **6.3 Unblinding Procedures (Code break)**

497 n.a.

498

499 **7. STUDY POPULATION**

500 **7.1 Eligibility criteria**

501 Patients admitted to the inpatient wards of the two regional hospitals Beata Vergine in Mendrisio and  
502 La Carità in Locarno, fulfilling one of the following inclusion criteria, will be eligible for the study:

503 -patients aged  $\geq 85$  years

504 -patients with  $> 10$  drugs

505 Patients with home care as well as patients from elderly homes, meeting the inclusion criteria, will be  
506 factored in the study population. Eligible patients will be included one-time only.

507

508 The presence of any of the following exclusion criteria will lead to patient exclusion:

509 -patients admitted to intensive care unit who do not reach inpatient wards

510 -patients who are planned to stay within inpatient wards for less than 48 hours

511 -patients who have been admitted to any of the EOC hospital wards within the previous 3 months and  
512 have been discharged at home

513 **7.2 Recruitment and screening**

514 Patients' selection will take place continuously, as new patients are admitted consecutively to the two  
515 hospitals, through GECCO – GEstione Coordinata del paziente - platform, which has been opportunely  
516 modified by the ICT. Among randomized patients, identification code numbers and arm of study will be  
517 assigned with specific softwares.

518 **7.3 Assignment to study groups**

519 The randomization process will be performed by the CTU of the EOC using a simple allocation  
520 technique to allocate patients in either the intervention or the control group.

521 **7.4 Criteria for withdrawal / discontinuation of participants**

522 n.a.

523



524 **8. STUDY INTERVENTION**

525 **8.1 Identity of Investigational Products (treatment / medical device)**

526 **8.1.1 Experimental Intervention (treatment / medical device)**

527 Eligible patients, randomized within the intervention arm, will receive medication reconciliation  
528 according to the following steps:

- 529 1) The pharmacy assistant will obtain the BPMH by compiling a comprehensive list of the current  
530 medicines the patient is taking and details about how the drugs are taken. To confirm the  
531 accuracy of the history, the pharmacy assistant will use at least two sources of information,  
532 one of which being, when possible, the interview with the patient and/or family members, in  
533 addition to referral letters, prescriptions and drug lists from primary care centres, and other.  
534 2) The clinical pharmacist will reconcile BPMH with prescribed medicines and, to resolve unclear  
535 or difficult to evaluate discrepancies between the two lists and/or to propose any adaptations  
536 of the pharmacotherapy, the clinical pharmacist will refer to the medical doctor responsible for  
537 the patient.  
538 3) The medical doctor will decide potential changes in pharmacotherapy and communicate them  
539 to the patient providing complete information on medicines.

540 Patients will be actively involved only at the beginning of the process, during the interview performed  
541 by the pharmacy assistant.

542 The overall duration of medication reconciliation has been estimated to be 50 to 60 minutes. The first  
543 step described above will last about 45-50 minutes, the second step 5 minutes, and the last step less  
544 than 5 minutes.

545 For patients allocated in the control group, the standard physician-acquired drug history will be  
546 performed at admission.

547 Medication reconciliation will be applied at hospital admission accordingly to the following time-  
548 schedules:

549 A) Patients admitted to the inpatient ward from Monday 7 am to Friday 12 pm: medication  
550 reconciliation within 48 hours

551 B) Patients admitted to the inpatient ward from Friday 12 pm to Monday 7 am: medication  
552 reconciliation within 48 hours, calculated starting from Monday morning at 7 am

553 C) Patients admitted from the 12 pm of the pre-holiday or during holidays: medication reconciliation  
554 within 48 hours calculated from the first non-holiday day at 7 am

555 **8.1.2 Control Intervention (standard/routine/comparator treatment / medical device)**

556 Patients of the control group will not receive BPMH and medication reconciliation at admission. The  
557 standard physician-acquired drug history will be performed as usual.

558 **8.1.3 Packaging, Labelling and Supply (re-supply)**

559 n.a.

560 **8.1.4 Storage Conditions**

561 n.a.

562 **8.2 Administration of experimental and control interventions**

563 **8.2.1 Experimental Intervention**

564 Please refer to 8.1.1.

565 **8.2.2 Control Intervention**

566 Please refer to 8.1.2.

567 **8.3 Dose / Device modifications**

568 n.a.

569 **8.4 Compliance with study intervention**

570 n.a.

571 **8.5 Data Collection and Follow-up for withdrawn participants**

572 n.a.

573 **8.6 Trial specific preventive measures**

574 n.a.

575 **8.7 Concomitant Interventions (treatments)**

576 n.a.

577 **8.8 Study Drug / Medical Device Accountability**

578 n.a.

579 **8.9 Return or Destruction of Study Drug / Medical Device**

580 n.a.

581

582

583 **9. STUDY ASSESSMENTS**

584 **9.1 Study flow chart(s) / table of study procedures and assessments**

585

|                             | Enrolment | Allocation | Post-allocation                           |   |   | Close-out |           |
|-----------------------------|-----------|------------|-------------------------------------------|---|---|-----------|-----------|
| TIMEPOINT                   | 0         | 0          | Within 48 h from admission (sequentially) |   |   | 30 days   | 12 months |
| ENROLMENT:                  |           |            |                                           |   |   |           |           |
| Eligibility screen          | X         |            |                                           |   |   |           |           |
| Allocation                  |           | X          |                                           |   |   |           |           |
| INTERVENTIONS:              |           |            |                                           |   |   |           |           |
| Standard medication history | X         |            |                                           |   |   |           |           |
| BPMH*                       |           |            | X                                         |   |   |           |           |
| MedRec**                    |           |            |                                           | X |   |           |           |
| Patient communication       |           |            |                                           |   | X |           |           |
| OUTCOME MEASURES:           |           |            |                                           |   |   |           |           |
| N. of readmissions          |           |            |                                           |   |   | X         |           |
| N. of ED*** visits          |           |            |                                           |   |   | X         |           |
| Death (yes/no)              |           |            |                                           |   |   |           | X         |
| Length of hospital stay     |           |            |                                           |   |   |           | X         |
| N. of ADRs                  |           |            |                                           |   |   |           | X         |
| N. of resources used        |           |            |                                           |   |   |           | X         |
| N. of discrepancies         |           |            |                                           |   |   |           | X         |
| MedRec duration             |           |            |                                           |   |   |           | X         |

586 \*Best Possible Medication History

587 \*\*Medication Reconciliation

588 \*\*\*Emergency Department

589 \*\*\*\*Adverse Drug Reactions

590 **9.2 Assessments of outcomes**

591 **9.2.1 Assessment of primary outcome**

592 Already described under 5.1.

593 **9.2.2 Assessment of secondary outcomes**

594 Already described under 5.2.

595 **9.2.3 Assessment of other outcomes of interest**

596 n.a.

597 **9.2.4 Assessment of safety outcomes**

598 n.a.

599 **9.2.4.1 Adverse events**

600 n.a.

601 9.2.4.2 Laboratory parameters  
602 n.a.  
603 9.2.4.3 Vital signs  
604 n.a.  
605 **9.2.5 Assessments in participants who prematurely stop the study**  
606 n.a.  
607 **9.3 Procedures at each visit**  
608 n.a.  
609 **9.3.1 Split into subtitles by type of visit**  
610 n.a.  
611 **9.3.2 Split into subtitles by type of visit**  
612 n.a.  
613 **9.3.3 Split into subtitles by type of visit**  
614 n.a.  
615

616 **10. SAFETY**

617 ADRs developed by patients during the hospital stay will be collected through the active  
618 pharmacovigilance system (as described under 5.2). As first, the assessor will draw false positive  
619 cases apart, then, he will categorize ADRs as either not serious or serious (according to the WHO  
620 seriousness criteria - for resulting in death, being life threatening, prolonging hospitalization, resulting  
621 in persistent disability or incapacity, and other). The assessor will be masked to group allocation.  
622 Finally, ADRs will be matched to either the intervention or the control group.  
623 Validated ADRs will be reported to the Centro Regionale di Farmacovigilanza del Canton Ticino for  
624 causality assessment and notification to Swissmedic.

625 **10.1 Drug studies**

626 n.a.

627 **10.1.1 Definition and assessment of (serious) adverse events and other safety related events**

628 n.a.

629 **10.1.2 Reporting of serious adverse events (SAE) and other safety related events**

630 n.a.

631 **10.1.3 Follow up of (Serious) Adverse Events**

632 n.a.

633

|     |                                                                                                     |
|-----|-----------------------------------------------------------------------------------------------------|
| 634 | <b>10.2 Medical Device Category C studies</b>                                                       |
| 635 | <b>10.2.1 Definition and Assessment of (Serious) Adverse Events and other safety related events</b> |
| 636 | n.a.                                                                                                |
| 637 | <b>10.2.2 Reporting of (Serious) Adverse Events and other safety related events</b>                 |
| 638 | n.a.                                                                                                |
| 639 | <b>10.2.3 Follow up of (Serious) Adverse Events</b>                                                 |
| 640 | n.a.                                                                                                |
| 641 | <b>10.3 Medical Device Category A studies</b>                                                       |
| 642 | <b>10.3.1 Definition and Assessment of safety related events</b>                                    |
| 643 | n.a.                                                                                                |
| 644 | <b>10.3.2 Reporting of Safety related events</b>                                                    |
| 645 | n.a.                                                                                                |
| 646 | <b>10.4 Assessment, notification and reporting on the use of radiation sources</b>                  |
| 647 | n.a.                                                                                                |
| 648 |                                                                                                     |

## 649 **11. STATISTICAL METHODS**

### 650 **11.1 Hypothesis**

651 Null hypothesis →  $H_0: P_1 - P_2 = 0$

652 Alternative hypothesis →  $H_1: P_1 - P_2 = D_1 \neq 0$

653  $P_1$  is the proportion of patients of the control group with post-discharge healthcare use, set at 0.30.

654  $P_2$  is the proportion of patients of the intervention group with post-discharge healthcare use, defined  
655 as  $D_1$  (difference  $P_1 - P_2$ ), and set at 6%

656 Significance level of 0.05, power of 0.80

657 Statistic test used: Pearson's chi-square test

### 658 **11.2 Determination of Sample Size**

659 Based on previous studies (20) and on data extracted from the EOC electronic database, we expect to  
660 observe a positive composite variable in about 30% of the patients in the control group. To detect a  
661 clinically relevant difference (set at 6%) in this composite variable between intervention and control  
662 groups, a sample size of 1718 patients has been calculated. Taking into account a possible drop-out  
663 for different reasons of about 10%, we calculated the definitive sample size of 1890 patients. Sample  
664 size calculations have been performed with PASS version 15.0.3 (NCSS, LCC, Kaysville, Utah, USA).

### 665 **11.3 Statistical criteria of termination of trial**

666 Termination of trial is not expected.

### 667 **11.4 Planned Analyses**

#### 668 **11.4.1 Datasets to be analysed, analysis populations**

669 Quantitative data will be summarized as mean with standard deviation (SD) or as median with  
670 interquartile range (IQR) as appropriate. Qualitative data will be presented as absolute numbers with  
671 percentages. Comparisons of data between the two populations (patients with medication  
672 reconciliation *versus* patients without, corresponding to usual care) will be performed with the Student  
673 t-test, Mann-Whitney test, chi-squared test, or Fisher exact test, as appropriated. Primary endpoint is a  
674 composite post-discharge healthcare use variable quantified as the proportion of patients with one  
675 unplanned all-cause hospital visit (readmission and emergency department visit within 30 days after  
676 initial discharge). Subsequent hospital visit rates will be compared between groups with the chi-  
677 squared test or the Fisher exact test as appropriate. All tests will be two-sided and  $p$ -value  $< 0.05$  will  
678 be considered to be statistically significant. Moreover, we will perform a time to event analysis with the  
679 Kaplan-Meier method. In this analysis the outcome of interest will be the previously described  
680 composite post-discharge healthcare use variable. Time to event curves of patients with and without  
681 medication reconciliation will be presented, and thereafter compared with the log-rank test.  
682 Unadjusted and adjusted hazard ratios with the corresponding 95% confidence intervals (CI) will be  
683 calculated using a Cox proportional hazard model. The proportional hazard assumption will be verified  
684 graphically and with the Schoenfeld test. If a variable will violate the proportional hazard assumption,  
685 this variable will be used to stratify the Cox model. All statistical analyses will be performed with Stata  
686 version 15 (StataCorp LP, College Station, TX, USA).

#### 687 **11.4.2 Primary Analysis**

688 Primary analysis will be performed by the biostatistician in order to determine the proportion of  
689 patients with one unplanned all-cause hospital visit (including readmission and emergency department  
690 visit within 30 days after initial discharge), in both the intervention and the control groups.

#### 691 **11.4.3 Secondary Analyses**

692 Secondary analyses will be performed to measure: 1) the incidence of ADRs during hospital stay; 2)  
693 the length of hospital stay; 3) the number of patients died during hospital stay; 4) the number of  
694 resources used during hospital stay (laboratory tests, radiologic exams, echocardiography, and  
695 electrocardiograms). All these data will be measured at the study close-out (12 months).

696 To measure the incidence of ADRs developed by patients during the hospital stay, the active  
697 pharmacovigilance system currently in use at the Centro Regionale di Farmacovigilanza del Canton  
698 Ticino, will be exploited. EMRs identified through this system and referring to patients from both the  
699 two study sites, aged  $\geq 85$  years or with more than 10 medications at admission, will be manually

700 validated by the scientific collaborator (to discard false positive cases). Subsequently, ADRs will be  
701 categorized as not serious or serious (according to the WHO seriousness criteria, for resulting in death,  
702 being life threatening, prolonging hospitalization, resulting in persistent disability or incapacity and  
703 other). Outcome assessor (the scientific collaborator) will be masked to group allocation. At the end of  
704 the analysis, ADRs will be matched to either the intervention or the control group.  
705 Length of hospital stay and the number of deaths during hospitalization will be retrieved by the ICT  
706 from administrative data sources (already in use within the EOC for other purposes).  
707 For the quantitative evaluation of the resources used during hospitalization, the database already  
708 existing for the *Choosing Wisely EOC* project will be exploited by the ICT for the counting of laboratory  
709 tests, whereas specific softwares will be applied to extrapolate information routinely registered by the  
710 EOC for administrative reasons on radiographic exams as well as echocardiography and  
711 electrocardiograms.  
712 A subgroup analysis will be performed for patients with a medication dispenser delivered by pharmacy.

#### 713 **11.4.4 Interim analyses**

714 n.a.

#### 715 **11.4.5 Safety analysis**

716 n.a.

#### 717 **11.4.6 Deviation(s) from the original statistical plan**

718 n.a.

### 719 **11.5 Handling of missing data and drop-outs**

720 Missing data and drop-outs will not be replaced.

721



## 722 12. QUALITY ASSURANCE AND CONTROL

### 723 12.1 Data handling and record keeping / archiving

724 In order to compile the BPMH, the pharmacy assistant will have to consult at least two sources of  
725 information. The most important source will be patient (and/or familiars) interview. Documents I-  
726 EOFARM-001, P-EOFARM-010 and I-EOFARM-159 have been prepared to guide and support this  
727 activity. In order to retrieve information on patients' pharmacotherapy before hospital admission from  
728 external pharmacies and general practitioners, provided that the patient gives his/her consent, the  
729 document M-EOFARM-050 has been predisposed. The interview will encompass questions about  
730 adherence to and understanding of drug therapy regimen, problems and adverse effects, and use of  
731 over-the-counter drugs, complementary and alternative medicines. If necessary, the pharmacy  
732 assistant will contact territorial health care facilities (family doctor office, pharmacy).

- 733 - I-EOFARM-001: "Linee guida per l'intervista per la rilevazione della migliore anamnesi  
734 farmacologica possibile"
- 735 - P-EOFARM-010: "Studio riconciliazione farmacologica EOC: il processo di verifica sistematica  
736 della farmacoterapia all'ammissione"
- 737 - I-EOFARM-159: "Migliore anamnesi farmacologica possibile: punti chiave per l'intervista al  
738 paziente"
- 739 - M-EOFARM-050: "Richiesta di trasmissione delle informazioni riguardanti la terapia  
740 farmacologica pre-ammissione"

741 Throughout the study period, regular meetings of the multi-professional group of investigators will be  
742 conducted to assess the study progress.

743 Eligible patients will be identified through GECO, which has been opportunely adapted for the study, to  
744 select patients meeting the inclusion criteria. The CTU will provide the randomization list which will be  
745 used to allocate eligible patients within one of the two arms of the study. All patients' related variables,  
746 along with identification code numbers and allocation groups, will be gathered within GECO and  
747 subsequently transferred to the Case Report Form (CRF). In comparison with paper-based data  
748 collection, the use of electronic handheld devices has the potential to improve protocol adherence,  
749 data accuracy, user acceptability, and timeliness of receiving data.

750 Local study pharmacy assistants have been trained to learn about medication reconciliation procedure  
751 and to get practice with the use of the modified version of GECO, thus potentially enhancing data  
752 quality, reducing the amount of missing or incomplete data, inaccuracies, and excessive variability in  
753 measurements.

#### 754 12.1.1 Case Report Forms

755 Data concerning study patients will be recorded within an electronic CRF.

756 Participants will be identified with a numerical coding system (defined by the ICT), and patients'  
757 names, initials, and birth dates, will not be reported. Age will be expressed as years at hospital  
758 admission.

759 The ICT (responsible for data management), and the biostatistician, will have the authorization for  
760 data entry in the CRF.

#### 761 12.1.2 Specification of source documents

762 Among data recorded on the CRF, patient age at admission, patient sex, number of drugs at  
763 admission, number of medication discrepancies, number of unjustified drugs added (committed drugs),  
764 number of omitted drugs, number of incorrect drug frequency, number of incorrect drug name, number  
765 of incorrect dose strength, number of incorrect drug formulations, interview duration, BPMH duration  
766 and overall medication reconciliation procedure duration (BPMH + medication reconciliation), will be  
767 extrapolated from GECO (where the clinical pharmacist register this information).

768 Administrative data registries (used within the EOC for other purposes), will be the data source for the  
769 number of all-cause hospital visits (readmissions and emergency department visits), the length of  
770 hospital stay, and the occurrence of death events, involving study participants. This information will be  
771 integrated by the ICT within the CRF.

772 For the quantitative evaluation of the resources used during hospitalization, the database already  
773 existing for the *Choosing Wisely EOC* project will be used for the counting of laboratory tests, whereas  
774 specific softwares will be applied to extrapolate information routinely registered by the EOC for  
775 administrative reasons on radiographic exams as well as echocardiography and electrocardiograms.  
776 All information concerning study participants will be integrated by the ICT within the CRF.

777 **12.1.3 Record keeping / archiving**

778 All study data will be archived without time restrictions after study termination.

779 **12.2 Data management**

780 **12.2.1 Data Management System**

781 Data will be managed at first in GECO, where pharmacy assistants and clinical pharmacists will enter  
782 patient pharmacotherapy information. Subsequently, identification code numbers and allocation  
783 groups will be assigned to included patients. Data will be transferred from GECO to the CRF.  
784 Additional outcome measures, extracted from administrative data sources, will be implemented in the  
785 CRF by the ICT. For the assessment of ADRs' incidence, the outcome assessor will use GECO to  
786 retrieve EMRs and validate potential ADRs. Subsequently these data will also be transferred to the  
787 CRF.

788 A pilot testing of the data management system will be performed one month before the start of the  
789 study to assess its reliability and validity.

790 **12.2.2 Data security, access and back-up**

791 Access to GECO and CRF will be protected, only authorized people will be able to access data.

792 Accesses will be tracked in time, modifications and correspondent authors registered.

793 Backup systems have been predisposed by the ICT.

794 **12.2.3 Analysis and archiving**

795 Data will be extracted from the source via scheduled ETL Job and stored in EOC's central  
796 Datawarehouse, where data will be cleaned, normalized and then published in a datamart. Access to  
797 datamart will be restricted to eligible users. The process will run every night and data will be  
798 maintained depending on the study's needs.

799 **12.2.4 Electronic and central data validation**

800 For validating data from the source, an approach based on the validation of internal consistency  
801 concepts, which uses expected associations within the dataset itself (e.g. completeness, uniformity  
802 and plausibility), will be applied.

803 **12.3 Monitoring**

804 The Principal Investigator will constantly monitor the source data and all study related documents.

805 **12.4 Audits and Inspections**

806 Source data and all study related documents will be accessible to auditors/inspectors of the CEC.

807 **12.5 Confidentiality, Data Protection**

808 Direct access to source documents will be permitted for purposes of monitoring (12.3), audits and  
809 inspections (12.4).

810 During the study:

811 - The Sponsor and the Principal Investigator will have access to the protocol

812 - The Principal Investigator, ICT, and the biostatistician, will have access to the dataset (CRF)

813 - Pharmacy assistants, clinical pharmacists and ICT, will have access to GECO for study purposes

814 - The scientific collaborator in charge of measuring the incidence of ADRs during hospitalization will  
815 have access to patients' EMRs (in GECO), to validate and assess ADR alerts raised by the active  
816 pharmacovigilance system.

817 After the study, the Principal Investigator will have ultimate authority over any publication and  
818 dissemination activity.

819 **12.6 Storage of biological material and related health data**

820 n.a.

821

822 **13. PUBLICATION AND DISSEMINATION POLICY**

823 We plan to communicate trial results to the Direzione Generale of the EOC. Afterwards, healthcare  
824 professionals will be informed about the study results and a publication in an international peer-  
825 reviewed scientific journal will be actively considered and pursued. To this purpose, eligible authors  
826 will have had to participate in each of the following sections: 1) conception and design of the study,  
827 collection and assembly of data, or data analysis and interpretation; 2) writing and reviewing the  
828 manuscript; 3) final approval of the manuscript.

829 The Principal Investigator will have the ultimate authority over any of the above reported activities.

830

831 **14. FUNDING AND SUPPORT**

832 **14.1 Funding**

833 Internal EOC funding for increasing the percentage of employment of pharmacy assistants who will  
834 obtain the BPMH. No other funding.

835 **14.2 Other Support**

836 n.a.

837 **15. INSURANCE**

838 n.a.

839

840 **16. REFERENCES**

- 841 1. Declaration of Helsinki, Version October 2013,  
842 (<http://www.wma.net/en/30publications/10policies/b3/index.html> )
- 843 2. International Conference on Harmonization (ICH, 1996) E6 Guideline for Good Clinical  
844 Practice.  
845 ([http://www.ich.org/fileadmin/Public\\_Web\\_Site/ICH\\_Products/Guidelines/Efficacy/E6/E6\\_R2\\_\\_](http://www.ich.org/fileadmin/Public_Web_Site/ICH_Products/Guidelines/Efficacy/E6/E6_R2__Step_4.pdf)  
846 [Step\\_4.pdf](http://www.ich.org/fileadmin/Public_Web_Site/ICH_Products/Guidelines/Efficacy/E6/E6_R2__Step_4.pdf))
- 847 3. International Conference on Harmonization (ICH, 1997) E8 Guideline: General Considerations  
848 for Clinical Trials  
849 [http://www.ich.org/fileadmin/Public\\_Web\\_Site/ICH\\_Products/Guidelines/Efficacy/E8/Step4/E8](http://www.ich.org/fileadmin/Public_Web_Site/ICH_Products/Guidelines/Efficacy/E8/Step4/E8_Guideline.pdf)  
850 [\\_Guideline.pdf](http://www.ich.org/fileadmin/Public_Web_Site/ICH_Products/Guidelines/Efficacy/E8/Step4/E8_Guideline.pdf))
- 851 4. Humanforschungsgesetz, HFG Bundesgesetz über die Forschung am Menschen  
852 (Bundesgesetz über die Forschung am Menschen, HFG) vom 30. September 2011/ Loi  
853 fédérale relative à la recherche sur l'être humain (loi relative à la recherche sur l'être humain,  
854 LRH) du 30 septembre 2011 / Legge federale concernente la ricerca sull'essere umano  
855 (Legge sulla ricerca umana, LRUm) del 30 settembre 2011
- 856 5. Verordnung über klinische Versuche in der Humanforschung (Verordnung über klinische  
857 Versuche, KlinV) vom 20. September 2013 / Ordonnance sur les essais cliniques dans le  
858 cadre de la recherche sur l'être humain (Ordonnance sur les essais cliniques, OClin) du 20  
859 septembre 2013. Ordinanza sulle sperimentazioni cliniche nella ricerca umana  
860 (Ordinanza sulle sperimentazioni cliniche, OSRUm) del 20 settembre 2013
- 861 6. Heilmittelgesetz, HMG Bundesgesetz über Arzneimittel und Medizinprodukte (Heilmittelgesetz,  
862 HMG) vom 15. Dezember 2000 / Loi fédérale sur les médicaments et les dispositifs médicaux  
863 (Loi sur les produits thérapeutiques, LPT) du 15 décembre 2000 / Legge federale sui  
864 medicamenti e i dispositivi medici (Legge sugli agenti terapeutici, LATer)
- 865 7. ISO 14155:2011 Clinical investigation of medical devices for human subjects -- Good clinical  
866 practice ([www.iso.org](http://www.iso.org))
- 867 8. ISO 10993 Biological evaluation of medical devices ([www.iso.org](http://www.iso.org))
- 868 9. MEDDEV 2.7/3 revision 3, May 2015
- 869 10. Medizinprodukteverordnung (MepV) vom 17. Oktober 2001 / Ordonnance sur les dispositifs  
870 médicaux (ODim) du 17 octobre 2001 / Ordinanza relativa ai dispositivi medici (ODmed) del  
871 17 ottobre 2001
- 872 11. WHO, International Clinical Trials Registry Platform (ICTRP) (<http://www.who.int/ictrp/en/>)
- 873 12. European regulation on medical devices 2017/745.
- 874 13. Strahlenschutzverordnung (StSV) vom 26. April 2017 / Ordonnance sur la radioprotection  
875 (ORaP) du 26 avril 2017 / Ordinanza sulla radioprotezione (ORaP) del 26 aprile 2017.
- 876 14. The High 5s Project. Standard Operating Protocol. Assuring Medication Accuracy at  
877 Transitions in Care: medication reconciliation. 2014. Available from:  
878 [http://www.who.int/patientsafety/implementation/solutions/high5s/High5\\_InterimReport.pdf](http://www.who.int/patientsafety/implementation/solutions/high5s/High5_InterimReport.pdf)
- 879 15. NICE NPSA Guidance: Medicines optimisation: the safe and effective use of medicines to  
880 enable the best possible outcomes. 2015. Available from  
881 <https://www.nice.org.uk/guidance/ng5>
- 882 16. Mueller SK, Cunningham S, Kripalani S, Schnipper J. Hospital-based Medication  
883 Reconciliation Practices: A Systematic Review. *Arch Intern Med* 2012, 172:1057-1069
- 884 17. Kwan JL, Sampson LL, Shojania KG. Medication reconciliation during transitions of care as a  
885 patient safety strategy: a systematic review. *Ann Intern Med* 2013, 158:397-403
- 886 18. Fishman L, Gehring K, Zimmermann C, Bezzola P. Medication Reconciliation in the Acute  
887 Care Hospital (Der systematische Medikationsabgleich im Akutspital). Zürich: Stiftung für  
888 Patientensicherheit, 2015
- 889 19. Giannini O, Rizza N, Pironi M, Parlato S, Waldispühl B, et al. Errors in medication history:  
890 implementation of the medication reconciliation process at admission to a general internal  
891 medicine ward. *Submitted*.
- 892 20. Cheema E, Alhomoud FK, AL-Deen Kinsara AS, Alsiddik J, Barnawi MH, et al. The impact of  
893 pharmacist-led medicines reconciliation on healthcare outcomes in secondary care: a  
894 systematic review and meta-analysis of randomized controlled trials. *PLOS ONE* 2018,  
895 <https://doi.org/10.1371/journal.pone.0193510>
- 896 21. Gillespie U, Alassaad A, Henrohn D, Garmo H, Hammarlund-Udenaes M, et al. A  
897 comprehensive pharmacist intervention to reduce morbidity in patients 80 years or older. A  
898 randomized controlled trial. *Arch Intern Med* 2009, 169(9): 894-900
- 899

900 **17. APPENDICES**

- 901 1. I-EOFARM-001
- 902 2. P-EOFARM-010
- 903 3. P-EOFARM-159
- 904 4. M-EOFARM-050
- 905 5. CRF
- 906
