# Supplementary material for: Effect of Medication Reconciliation at Hospital Admission on 30-Day Returns to Hospital: A Randomized Clinical Trial
Source: PubMed Central journal article supplement (PMC8446815; doi:10.1001/jamanetworkopen.2021.24672), 2021-09-16
Supplement: jamanetwopen-e2124672-s003.pdf [file jamanetwopen-e2124672-s003.pdf]

## Data Sharing Statement

Ceschi A, Nosedà R, Pironi M. Effect of medication reconciliation at hospital admission on 30-day returns to hospital: a randomized clinical trial. *JAMA Netw Open*. 2021;4(9):e2124672. doi:10.1001/jamanetworkopen.2021.24672

### Data

**Data available:** No

### Additional Information

**Explanation for why data not available:** The dataset used and analysed during the current study is available from the corresponding author on reasonable request.
