# Supplementary material for: Effect of Medication Reconciliation at Hospital Admission on 30-Day Returns to Hospital: A Randomized Clinical Trial
Source: JAMA Netw Open. 2021 Sep 16;4(9):e2124672. doi: 10.1001/jamanetworkopen.2021.24672 (PMC8446815; doi:10.1001/jamanetworkopen.2021.24672)
Supplement: Supplement 2. — eMethods [file jamanetwopen-e2124672-s002.pdf]

## Supplemental Online Content

Ceschi A, Nosedà R, Pironi M, et al. Effect of medication reconciliation at hospital admission on 30-day returns to hospital: a randomized clinical trial. *JAMA Netw Open*. 2021;4(9):e2124672. doi:10.1001/jamanetworkopen.2021.24672

### **eMethods.**

This supplemental material has been provided by the authors to give readers additional information about their work.

## eMethods

List of predefined words and word combinations used to assess the period prevalence of adverse drug events (ADEs) occurring during the hospital stay (secondary outcome).

|                                        |
|----------------------------------------|
| Adverse reaction[s]                    |
| Drug-induced                           |
| Drug allergy                           |
| Pharmacological differential diagnosis |
| Iatrogen differential diagnosis        |
| Intake differential diagnosis          |
| On iatrogenic                          |
| Iatrogenic aetiology                   |
| Iatrogenic component                   |
| Iatrogenic origin                      |
| Drug aetiology                         |
| Pharmaco-induced aetiology             |
| Pharmacotherapy                        |
| Pharmacologic                          |
| Drug origin                            |
| Pharmacological origin                 |
| Adverse event                          |
| On anticoagulation                     |
| On anticoagulant therapy               |
| On immunosuppression                   |
| On immunosuppressive treatment         |
| On immunosuppressive therapy           |
| On steroid therapy                     |
| On corticosteroid therapy              |
| On drug reactions                      |

On toxicity from

On polypharmacy

On polypharmacotherapy

On overdose

On contrast medium

On opioid treatment

On opioid treatment

Probable medical cause

Probable pharmacological cause

Probable drug-induced cause

Probable medical cause

Probable medicinal origin

Probable pharmacological origin

Probable drug-induced origin

Pharmaco-toxic origin

Pharmacological aetiology

Drug-induced aetiology

Drug-induced dd

Differential diagnosis by drugs

dd overdose

Differential diagnosis overdose

Therapy-induced

Toxic genesis

Pharmacological genesis

Medicinal genesis

DRESS

Drug reaction with eosinophilia and systemic symptoms

SJS

Stevens Johnson syndrome

TEN

Toxic necrotic epidermolysis

Toxic epidermal necrolysis

Lyell

AGEP

Acute generalised exanthematous pustulosis

PML

Progressive multifocal leukoencephalopathy

HIT

Heparin-induced thrombocytopenia

Agranulocytosis Novalgin

Agranulocytosis metamizol

Iatrogenic neutropenia

Neutropenia of medical origin

Neutropenia on therapy

Iatrogenic agranulocytosis

Agranulocytosis of medical origin

Agranulocytosis on therapy

Ferinject extravasation

Ferinject allergic reaction

Ferinject allergy

Ferinject hypersensitivity

Ferinject hypersensitivity reactions

Toxidermia

DILI

Medicinal hepatotoxicity

Iatrogenic hepatotoxicity

Hepatotoxicity on therapy

Medicinal nephrotoxicity

Iatrogenic Nephrotoxicity

Nephrotoxicity on therapy

On inadequate intake

On incongruous intake

Medical hepatopathy

Medical hepatitis

Drug interaction

On Marcoumar

On Sintrom

On Xarelto

On Pradaxa

On Eliquis

On Lixiana

Cerebral haemorrhage

Cerebral hematoma

Subarachnoid hematoma

Neuroleptic malignant syndrome

Neuroleptic malignant syndrome

Serotonergic syndrome

Medical pancreatitis

Anaphylactic shock on therapy

Contraceptive.\*embolism

Contraceptive.\*thrombosis

Contraceptive.\*TVP

Pill.\*embolism

Pill.\*thrombosis

Pill.\*THB

Gastrointestinal bleeding.\*Marcoumar

Gastrointestinal bleeding.\*Synthrom

Gastrointestinal bleeding.\*Xarelto

SIADH

On methotrexate

On methotrexate

On mtx
